# Supplementary material for: Enhanced photocatalytic dye degradation and hydrogen production ability of Bi25FeO40-rGO nanocomposite and mechanism insight
Source: PubMed Central journal article supplement (PMC6056507; doi:10.1038/s41598-018-29402-w), 2018-07-23
Supplement: 41598_2018_29402_MOESM1_ESM.pdf [file 41598_2018_29402_MOESM1_ESM.pdf]

# Enhanced photocatalytic dye degradation and hydrogen production ability of Bi<sub>25</sub>FeO<sub>40</sub>-rGO nanocomposite and mechanism insight

M. A. Basith<sup>1,\*</sup>, Ragib Ahsan<sup>1</sup>, Ishrat Zarin<sup>1</sup>, and M. A. Jalil<sup>1</sup>

<sup>1</sup>Nanotechnology Research Laboratory, Department of Physics, Bangladesh University of Engineering and Technology, Dhaka-1205, Bangladesh

\*mabasith@phy.buet.ac.bd

## ABSTRACT

A comprehensive comparison between Bi<sub>25</sub>FeO<sub>40</sub>-reduced graphene oxide(rGO) nanocomposite and BiFeO<sub>3</sub>-rGO nanocomposite has been performed to investigate their photocatalytic abilities in degradation of Rhodamine B dye and generation of hydrogen by water-splitting. The hydrothermal technique adapted for synthesis of the nanocomposites provides a versatile temperature-controlled phase selection between sillenite Bi<sub>25</sub>FeO<sub>40</sub> and perovskite BiFeO<sub>3</sub>. Both sillenite and perovskite structured nanocomposites are stable and exhibit considerably higher photocatalytic degradation over pure BiFeO<sub>3</sub> nanoparticles and commercially available Degussa P25 titania. Notably, Bi<sub>25</sub>FeO<sub>40</sub>-rGO nanocomposite has demonstrated superior photocatalytic ability as well as stability under visible light irradiation than that of BiFeO<sub>3</sub>-rGO nanocomposite. The possible mechanism behind the superior photocatalytic performance of Bi<sub>25</sub>FeO<sub>40</sub>-rGO nanocomposite has been critically discussed.

## Electronic Supplementary Information

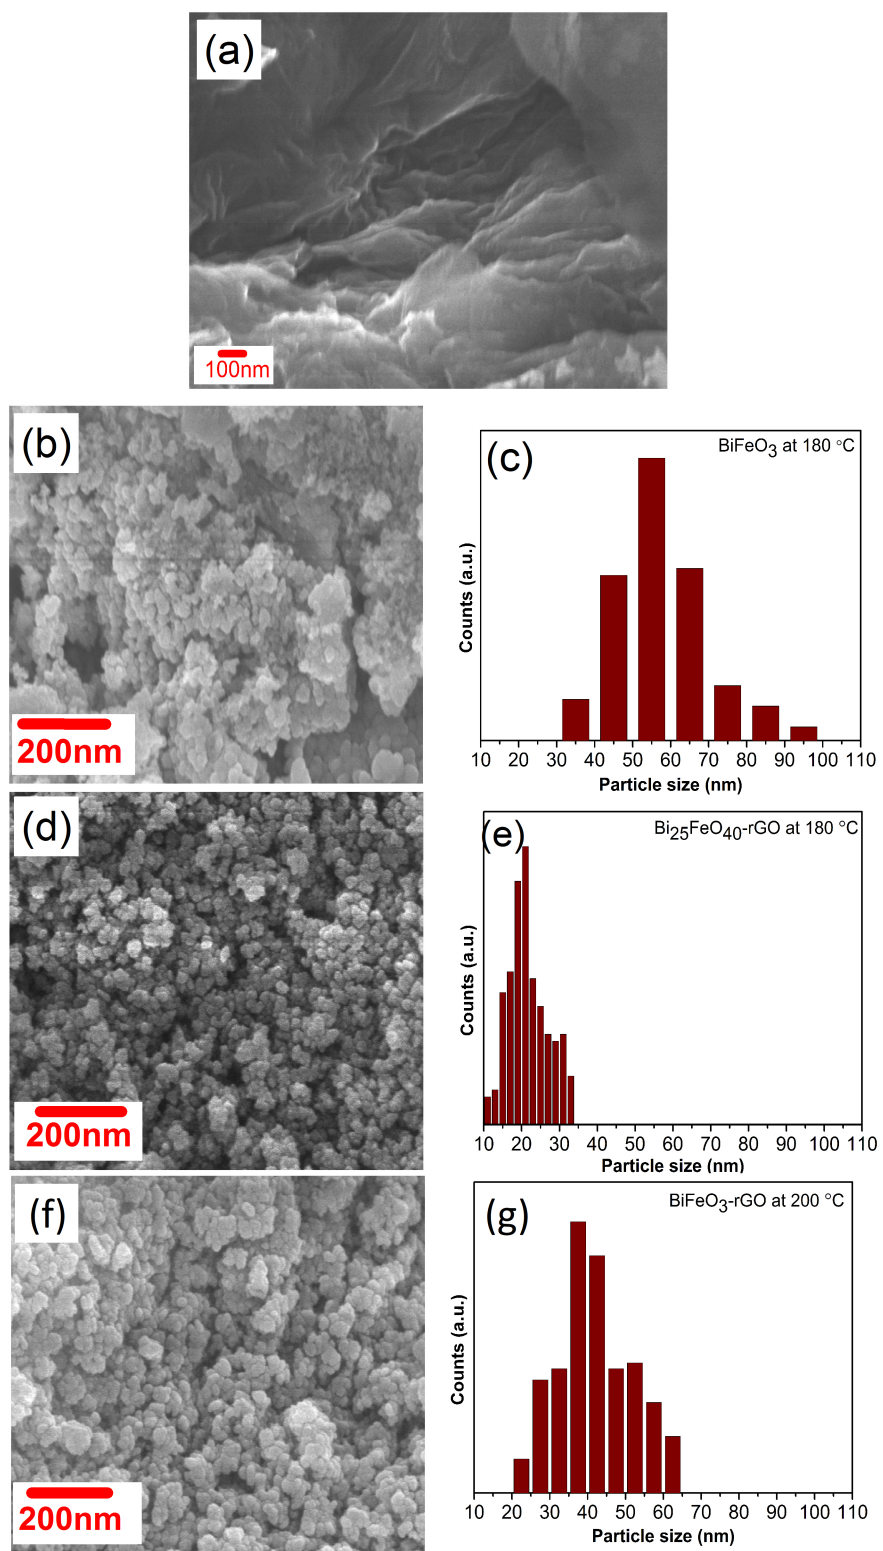

**Fig. S1** FESEM images of (a) sheet like structure of GO, (b) perovskite BiFeO<sub>3</sub> nanoparticles (c) corresponding histogram of particle size for (b), (d) sillenite Bi<sub>25</sub>FeO<sub>40</sub>-rGO nanocomposite, (e) corresponding histogram of particle size for (d), and (f) perovskite BiFeO<sub>3</sub>-rGO nanocomposite; corresponding histogram of particle size for (f) is given in (g) <sup>1</sup>

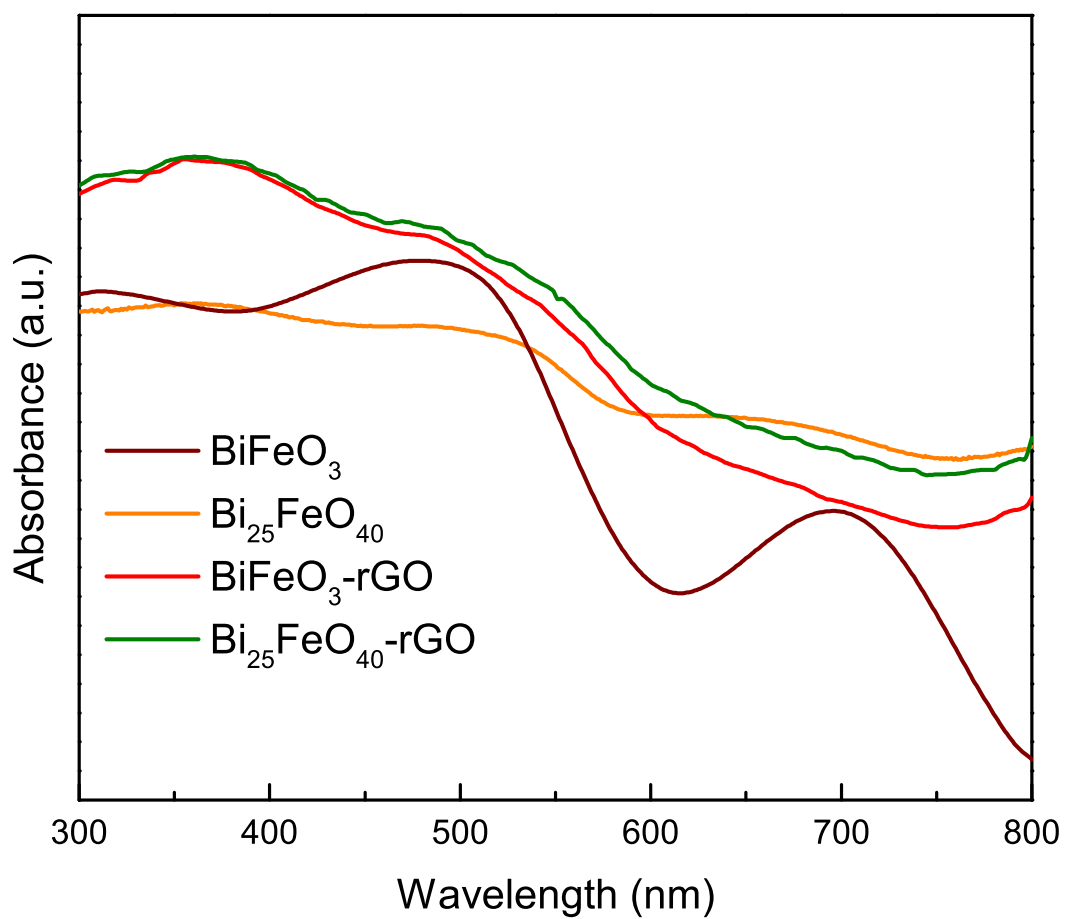

**Fig. S2** UV-vis absorbance spectra of  $\text{BiFeO}_3$  nanoparticles, perovskite  $\text{BiFeO}_3\text{-rGO}$ , and sillenite  $\text{Bi}_{25}\text{FeO}_{40}\text{-rGO}$  nanocomposites

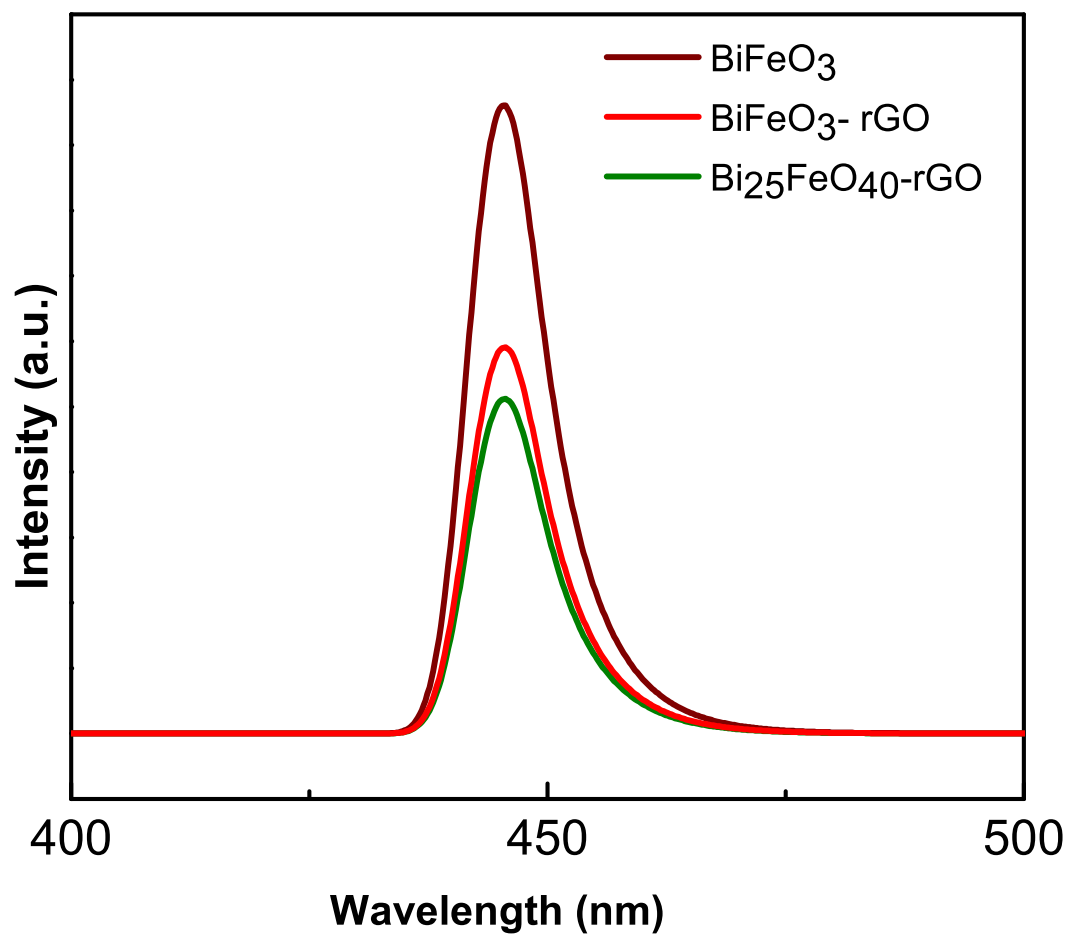

**Fig. S3** Steady state PL spectra of BiFeO<sub>3</sub> nanoparticles, BiFeO<sub>3</sub>-rGO nanocomposite and Bi<sub>25</sub>FeO<sub>40</sub>-rGO nanocomposite

## Reference

1. Jalil, M. A. et al. Temperature-dependent phase transition and comparative investigation on enhanced magnetic and optical properties between sillenite and perovskite bismuth ferrite-rGO nanocomposites. *Journal of Applied Physics* 122, 084902, doi:10.1063/1.4985840 (2017).
